# Supplementary material for: C-Halide bond cleavage by a two-coordinate iron(i) complex
Source: Royal Society of Chemistry journal article supplement (doi:10.1039/c8dt05002c), 2019-01-01
Supplement: c8dt05002c1.pdf [file c8dt05002c1.pdf]

## **C-Halide Bond Activation by a Two-Coordinate Iron(I) Complex**

C. G. Werncke,<sup>a,\*</sup> J. Pfeiffer,<sup>a</sup> I. Müller,<sup>a</sup> L. Vendier,<sup>b</sup> S. Sabo-Etienne,<sup>b</sup> Sébastien Bontemps<sup>b</sup>

a) Philipps-University Marburg, Hans-Meerwein-Straße 4, D-35032 Marburg, Germany

b) CNRS, LCC (Laboratoire de Chimie de Coordination) 205 route de Narbonne, 31077 Toulouse and Université de Toulouse, UPS, INPT 31077 Toulouse, France

## Table of Contents

|                                                                                                      |    |
|------------------------------------------------------------------------------------------------------|----|
| Spectra of complexes 1-6 .....                                                                       | 3  |
| 1. K{18-crown-6}[Fe(Br)(N(SiMe <sub>3</sub> ) <sub>2</sub> ) <sub>2</sub> ] (1a) .....               | 3  |
| 2. K{18-crown-6}[Fe(Cl)(N(SiMe <sub>3</sub> ) <sub>2</sub> ) <sub>2</sub> ] (1b) .....               | 3  |
| 3. K{18-crown-6}[Fe(Bz)(N(SiMe <sub>3</sub> ) <sub>2</sub> ) <sub>2</sub> ] (2) .....                | 4  |
| 4. K{18-crown-6}[Fe(Br) <sub>2</sub> (N(SiMe <sub>3</sub> ) <sub>2</sub> ) <sub>2</sub> ] (3a) ..... | 4  |
| 5. K{18-crown-6}[Fe(Cl) <sub>2</sub> (N(SiMe <sub>3</sub> ) <sub>2</sub> ) <sub>2</sub> ] (3b) ..... | 5  |
| 6. KFe(Bz)(N(SiMe <sub>3</sub> ) <sub>2</sub> ) <sub>2</sub> (4) .....                               | 6  |
| 7. K{18-crown-6}[Fe( <sup>n</sup> Bu)(N(SiMe <sub>3</sub> ) <sub>2</sub> ) <sub>2</sub> ] (5a) ..... | 6  |
| 8. K{18-crown-6}[Fe(Ph)(N(SiMe <sub>3</sub> ) <sub>2</sub> ) <sub>2</sub> ] (6) .....                | 7  |
| Spectra of NMR-scale reactions .....                                                                 | 7  |
| X-Ray diffraction analysis and molecular structures .....                                            | 16 |
| References .....                                                                                     | 26 |

## Spectra of complexes 1-6

### 1. $\text{K}\{18\text{-crown-6}\}\{\text{Fe}(\text{Br})(\text{N}(\text{SiMe}_3)_2)_2\}$ (**1a**)

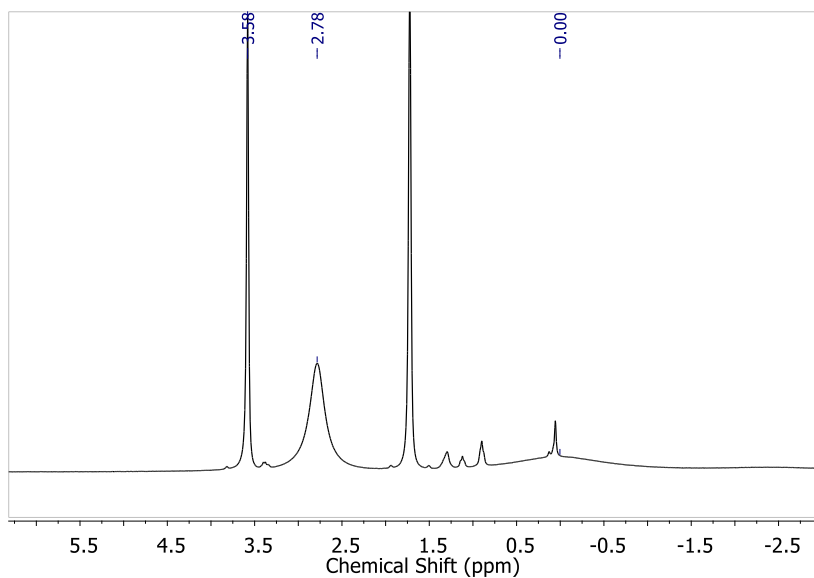

Figure S1.  $^1\text{H}$  NMR spectrum of  $\text{K}\{18\text{-crown-6}\}\{\text{Fe}(\text{Br})(\text{N}(\text{SiMe}_3)_2)_2\}$  (**1a**) in  $\text{THF-d}_8$  (500.1 MHz).

### 2. $\text{K}\{18\text{-crown-6}\}\{\text{Fe}(\text{Cl})(\text{N}(\text{SiMe}_3)_2)_2\}$ (**1b**)

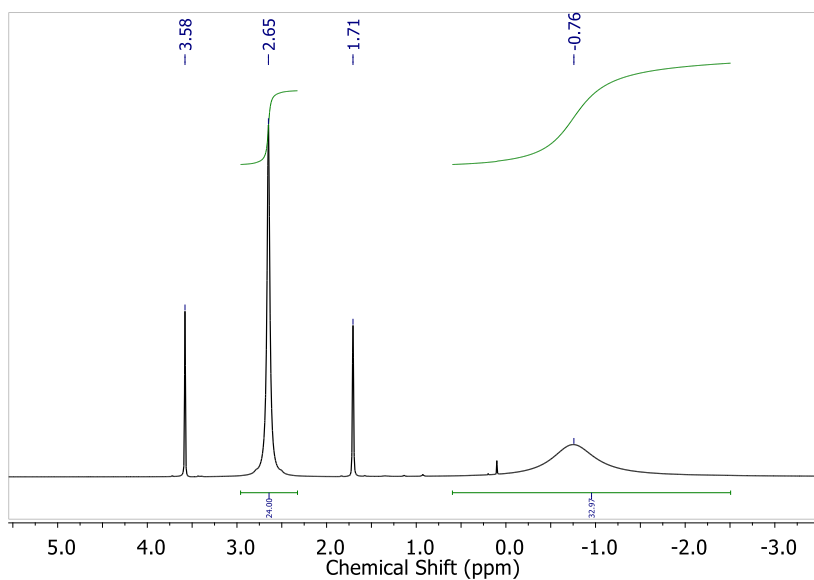

Figure S2.  $^1\text{H}$  NMR spectrum of  $\text{K}\{18\text{-crown-6}\}\{\text{Fe}(\text{Cl})(\text{N}(\text{SiMe}_3)_2)_2\}$  (**1b**) in  $\text{THF-d}_8$  (500.1 MHz).

### 3. $\text{K}\{18\text{-crown-6}\}[\text{Fe}(\text{Bz})(\text{N}(\text{SiMe}_3)_2)_2]$ (**2**)

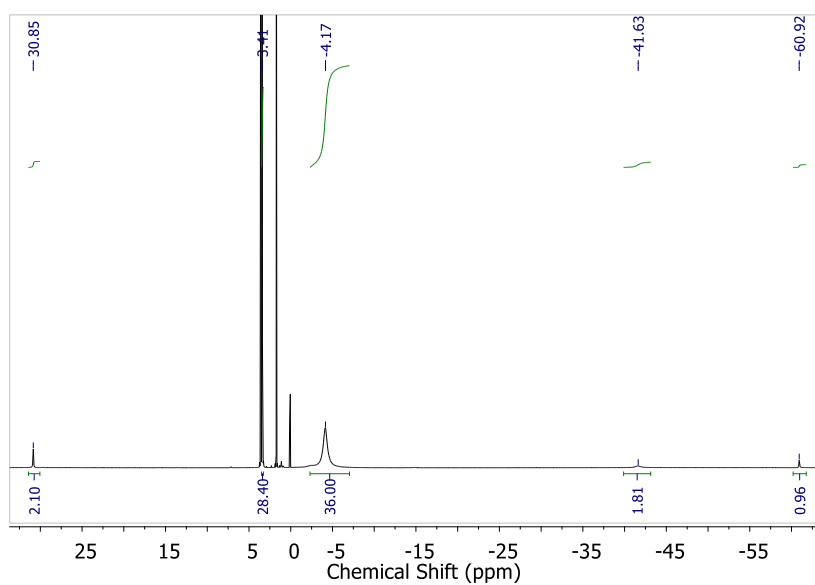

Figure S3.  $^1\text{H}$  NMR spectrum of  $\text{K}\{18\text{-crown-6}\}[\text{Fe}(\text{Bz})(\text{N}(\text{SiMe}_3)_2)_2]$  (**2**) in  $\text{THF-d}_8$  (500.1 MHz).

### 4. $\text{K}\{18\text{-crown-6}\}[\text{Fe}(\text{Br})_2(\text{N}(\text{SiMe}_3)_2)_2]$ (**3a**)

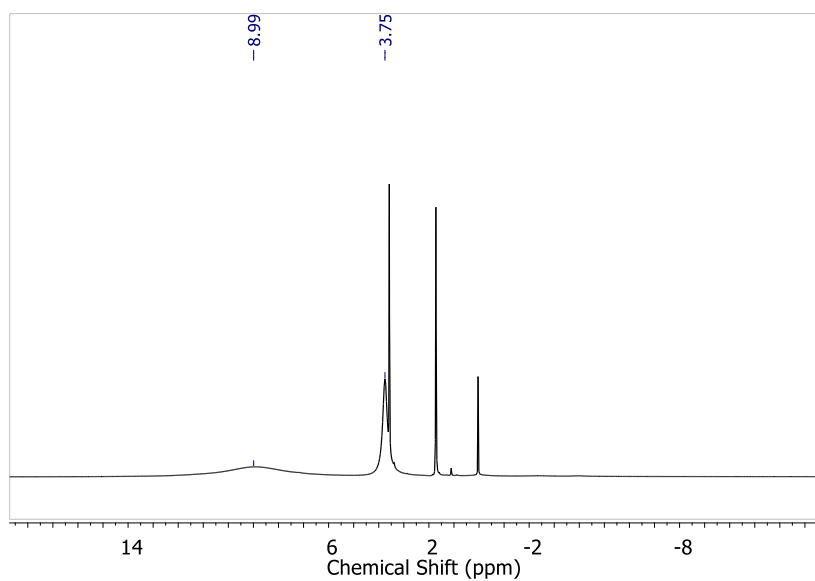

Figure S4.  $^1\text{H}$  NMR spectrum of  $\text{K}\{18\text{-crown-6}\}[\text{Fe}(\text{Br})_2(\text{N}(\text{SiMe}_3)_2)_2]$  (**3a**) in  $\text{THF-d}_8$  (500.1 MHz).

5.  $\text{K}\{18\text{-crown-6}\}[\text{Fe}(\text{Cl})_2(\text{N}(\text{SiMe}_3)_2)_2]$  (**3b**)

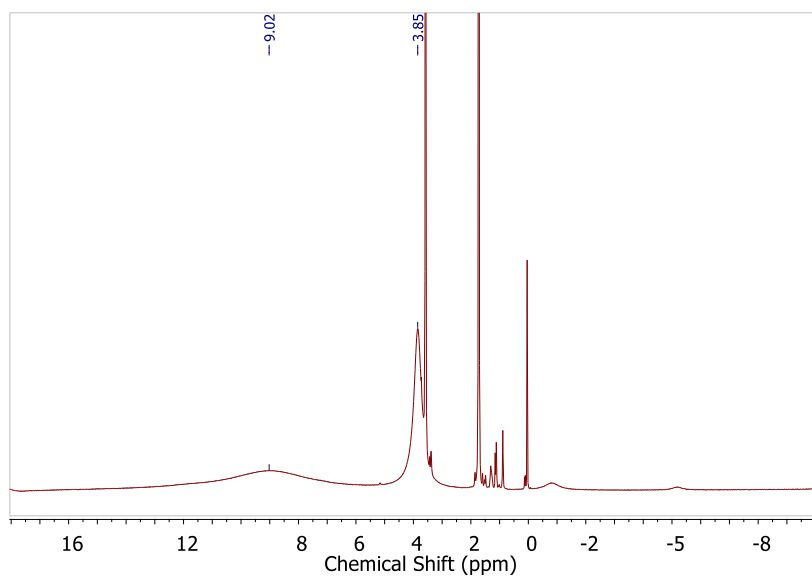

Figure 5.  $^1\text{H}$  NMR spectrum of  $\text{K}\{18\text{-crown-6}\}[\text{Fe}(\text{Cl})_2(\text{N}(\text{SiMe}_3)_2)_2]$  (**6**) in  $[\text{D}_8]\text{THF}$  (500.1 MHz).

## 6. $\text{KFe}(\text{Bz})(\text{N}(\text{SiMe}_3)_2)_2$ (**4**)

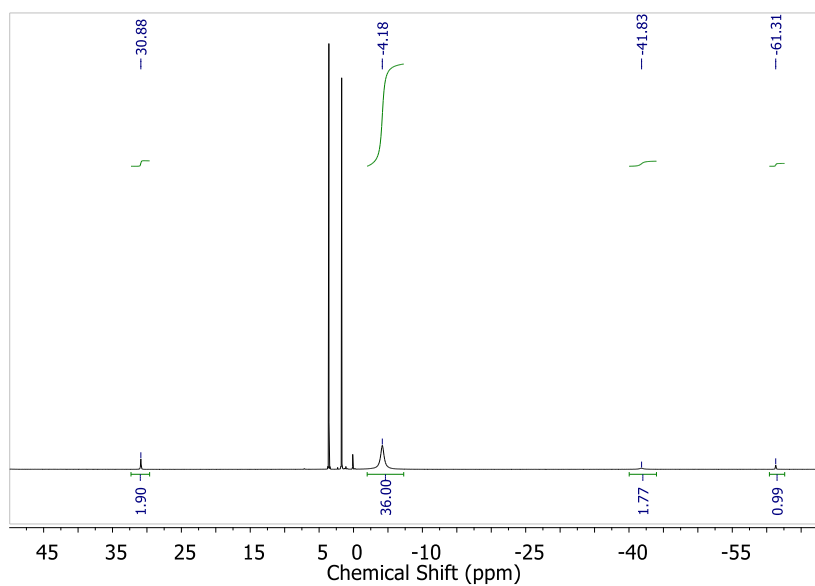

Figure S6.  $^1\text{H}$  NMR spectrum of  $\text{K}[\text{Fe}(\text{Bz})(\text{N}(\text{SiMe}_3)_2)_2]$  (**4**) in  $\text{THF-d}_8$  (500.1 MHz).

## 7. $\text{K}\{18\text{-crown-6}\}[\text{Fe}(n\text{Bu})(\text{N}(\text{SiMe}_3)_2)_2]$ (**5a**)

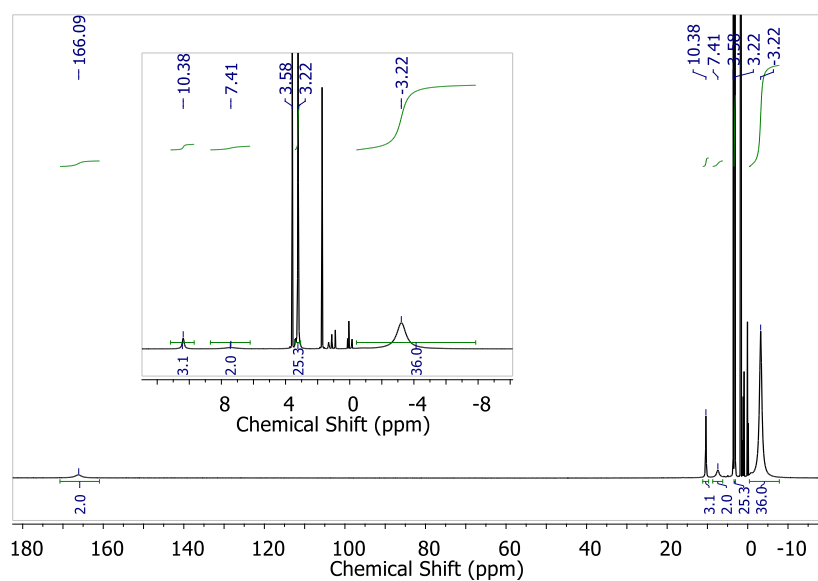

Figure S7.  $^1\text{H}$  NMR spectrum of  $\text{K}\{18\text{-crown-6}\}[\text{Fe}(n\text{Bu})(\text{N}(\text{SiMe}_3)_2)_2]$  (**5a**) in  $\text{THF-d}_8$  (500.1 MHz).

## 8. $K\{18\text{-crown-6}\}[\text{Fe}(\text{Ph})(\text{N}(\text{SiMe}_3)_2)_2]$ (**6**)

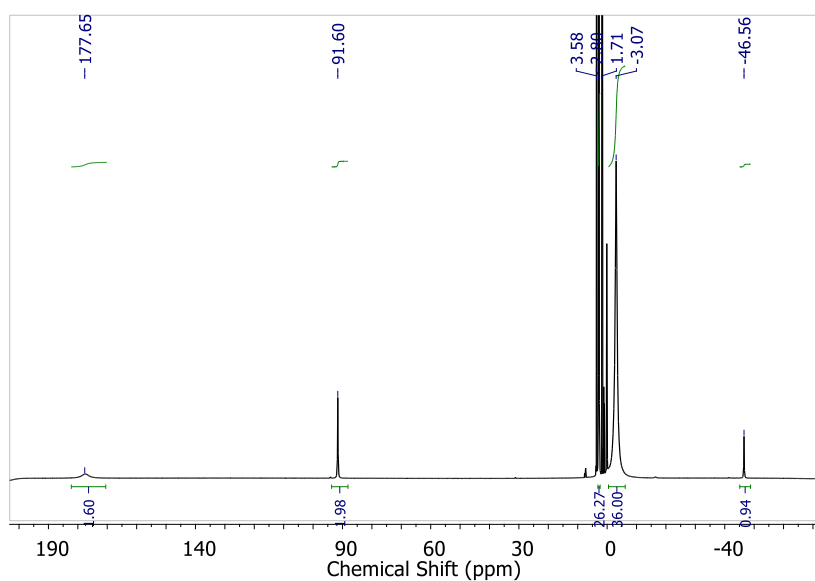

Figure S8.  $^1\text{H}$  NMR spectrum of  $K\{18\text{-crown-6}\}[\text{Fe}(\text{Ph})(\text{N}(\text{SiMe}_3)_2)_2]$  (**6**) in  $\text{THF-d}_8$  (500.1 MHz).

## Spectra of NMR-scale reactions

### Reaction of **A** with benzyl bromide

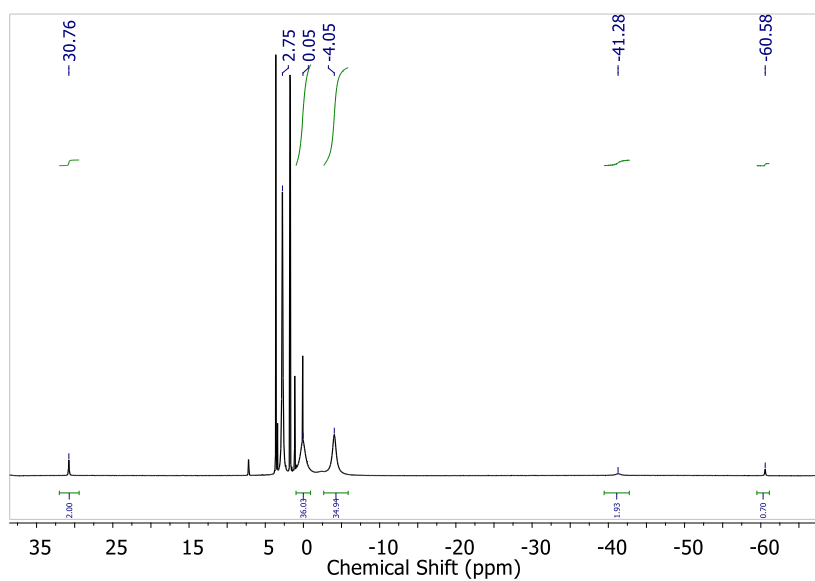

Figure S9.  $^1\text{H}$  NMR spectrum of a reaction of **A** with approx. 0.5 equiv. benzyl bromide in  $\text{THF-d}_8$  (500.1 MHz).  $[\text{Fe}(\text{Br})(\text{N}(\text{SiMe}_3)_2)_2]^-$ :  $\delta = 0.08$  ppm.  $\text{Fe}(\text{Bz})(\text{N}(\text{SiMe}_3)_2)_2^-$ :  $\delta$  (ppm) = 30.76 ( $\text{C}_{\text{Ar}}\text{-H}$ ), -4.05 ( $\text{SiMe}_3$ ), -41.28 ( $\text{C}_{\text{Ar}}\text{-H}$ ), -60.58 ( $\text{C}_{\text{Ar}}\text{-H}$ ).

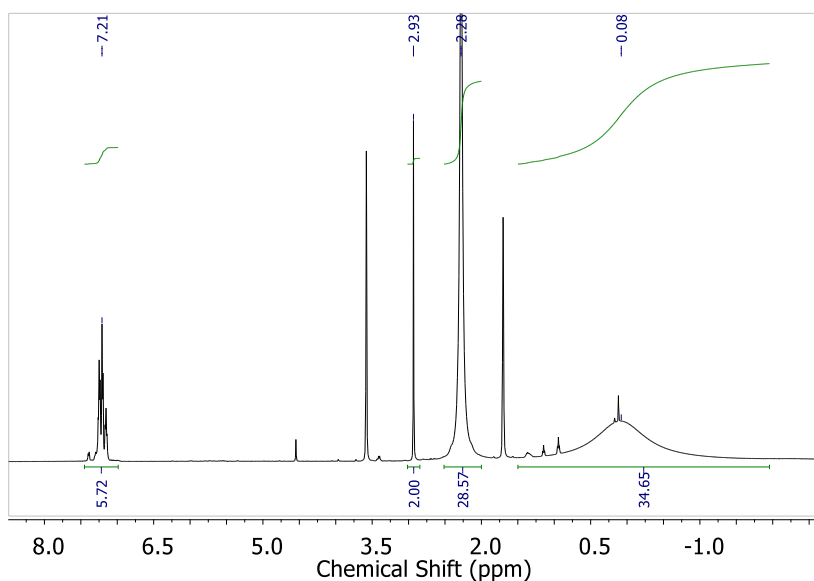

**Figure S10.**  $^1\text{H}$  NMR spectrum of a reaction of **A** with 1 equiv. benzyl bromide in  $\text{THF-d}_8$  (500.1 MHz).  $[\text{Fe}(\text{Br})(\text{N}(\text{SiMe}_3)_2)_2]^-$ :  $\delta = 0.08$  ppm. Signals at 7.21 and 2.93 ppm belongs to the homo-coupling product  $\text{Ph-CH}_2\text{-CH}_2\text{-Ph}$ .

#### Reaction of **A** with Benzyl chloride

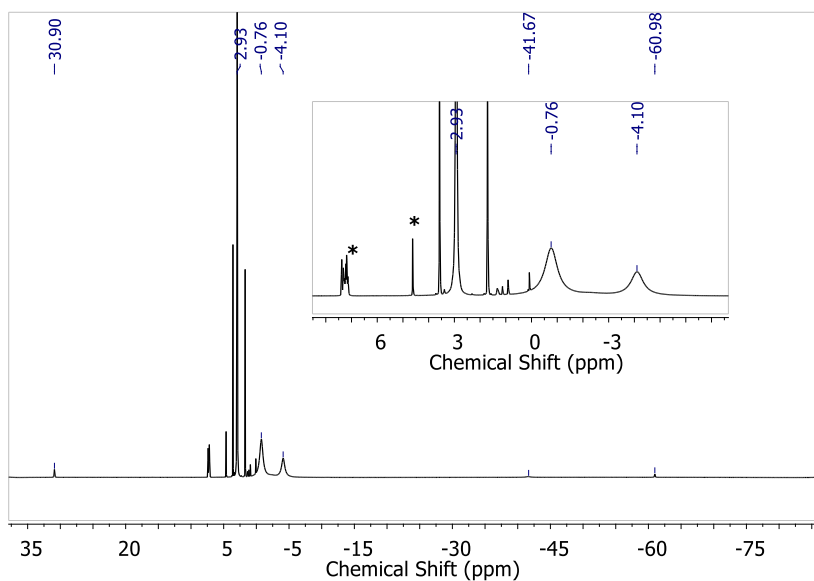

**Figure S11.**  $^1\text{H}$  NMR spectrum of a reaction of **A** with 1 equiv. benzyl chloride in  $\text{THF-d}_8$  (500.1 MHz) after 15 min.  $[\text{Fe}(\text{Cl})(\text{N}(\text{SiMe}_3)_2)_2]^-$ :  $\delta = -0.76$  ppm.  $[\text{Fe}(\text{Bz})(\text{N}(\text{SiMe}_3)_2)_2]^-$ :  $\delta$  (ppm) = 30.90 ( $\text{C}_{\text{Ar}}\text{-H}$ ), -4.10 ( $\text{SiMe}_3$ ), -41.67 ( $\text{C}_{\text{Ar}}\text{-H}$ ), -60.98 ( $\text{C}_{\text{Ar}}\text{-H}$ ). (\*) denotes unreacted benzylchloride.



### Reaction of A with Benzyl fluoride

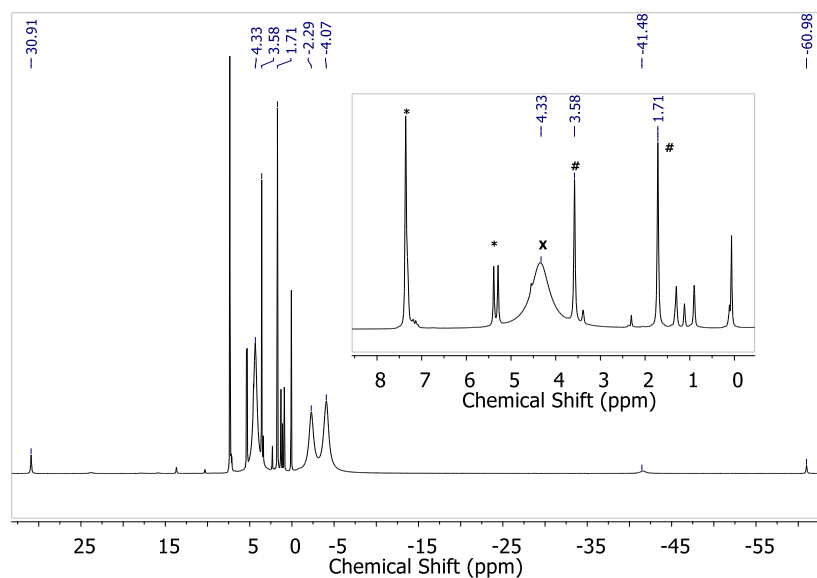

**Figure S12.**  $^1\text{H}$  NMR spectrum of a reaction of **A** with 1 equiv. benzyl fluoride in  $\text{THF-d}_8$  after 1 h (500.1 MHz).  $[\text{Fe}(\text{F})(\text{N}(\text{SiMe}_3)_2)_2]^-$ :  $\delta$  (ppm) = -2.29 ( $w_{1/2}$  = 715 Hz,  $\text{SiMe}_3$ ).  $[\text{Fe}(\text{Bz})(\text{N}(\text{SiMe}_3)_2)_2]^-$ :  $\delta$  (ppm) = 30.91 ( $\text{C}_{\text{Ar}}\text{-H}$ ), -4.07 ( $\text{SiMe}_3$ ), -41.48 ( $\text{C}_{\text{Ar}}\text{-H}$ ), -60.98 ( $\text{C}_{\text{Ar}}\text{-H}$ ). (\*) unreacted benzyl fluoride; (#)  $\text{THF-d}_8$ ; (x)  $\text{K}^+\{18\text{-crown-6}\}$ .

### Reaction of A with 1-Bromobutane

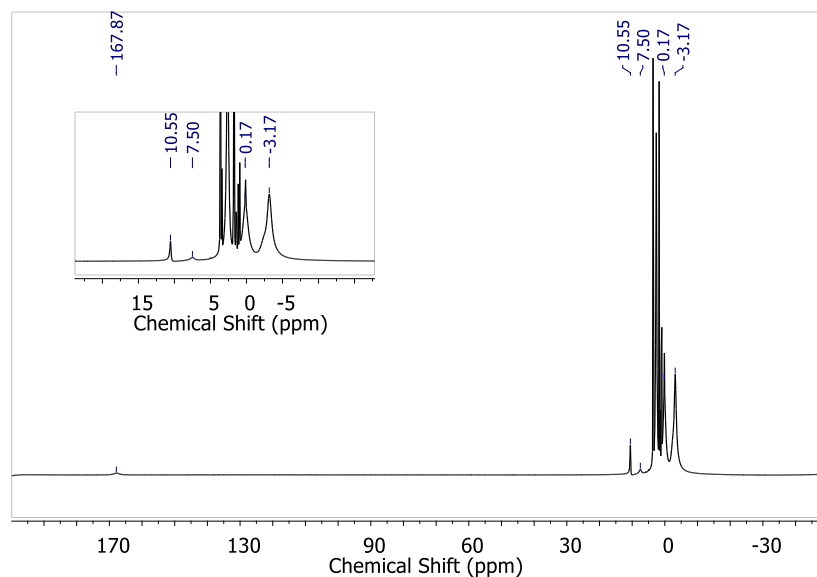

**Figure S13.**  $^1\text{H}$  NMR spectrum of a reaction of **A** with 0.6 equiv. 1-bromobutane in  $\text{THF-d}_8$  (500.1 MHz).  $[\text{Fe}(\text{Br})(\text{N}(\text{SiMe}_3)_2)_2]^-$ :  $\delta$  (ppm) = -0.17 (36H,  $\text{SiMe}_3$ ).  $[\text{Fe}(n\text{Bu})(\text{N}(\text{SiMe}_3)_2)_2]^-$ :  $\delta$  (ppm) = 167.9, 10.55, 7.50, -3.17 (36H,  $\text{SiMe}_3$ ).

### Reaction of A with 1-Chlorobutane

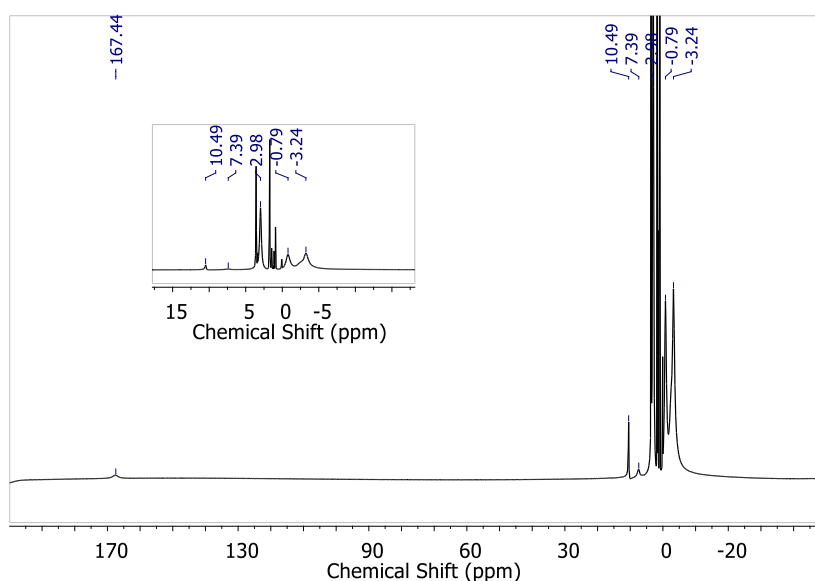

**Figure S14.**  $^1\text{H}$  NMR spectrum of a reaction of **A** with 1 equiv. 1-chlorobutane in  $\text{THF-d}_8$  (500.1 MHz).  $[\text{Fe}(\text{Cl})(\text{N}(\text{SiMe}_3)_2)_2]^-$ :  $\delta$  (ppm) = -0.79 ( $\text{SiMe}_3$ ).  $[\text{Fe}(n\text{Bu})(\text{N}(\text{SiMe}_3)_2)_2]^-$ :  $\delta$  (ppm) = -167.4, 10.49, 7.39, -3.24 ( $\text{SiMe}_3$ ).

### Reaction of A with pentyl fluoride

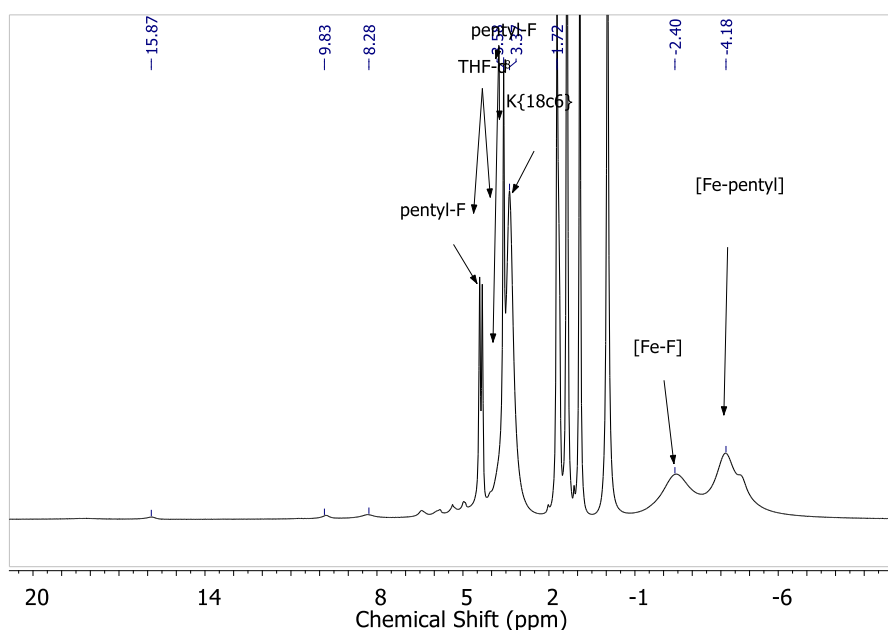

**Figure S15.**  $^1\text{H}$  NMR spectrum of a reaction of **A** with 1 equiv. pentyl fluoride in  $\text{THF-d}_8$  after 48 h of heating at  $60^\circ\text{C}$  and after filtration to remove the black paramagnetic decomposition products (500.1 MHz).  $[\text{Fe}(\text{pentyl})(\text{N}(\text{SiMe}_3)_2)_2]^-$ :  $\delta$  (ppm) = 15.87, 9.8, 8.28, -4.18 ( $w_{1/2} = 450$  Hz,  $\text{SiMe}_3$ ,  $\text{SiMe}_3$ ),  $[\text{Fe}(\text{F})(\text{N}(\text{SiMe}_3)_2)_2]^-$ :  $\delta$  (ppm) = -2.40 ( $\text{SiMe}_3$ ). The small shoulder at around -4.7 ppm belongs to an unknown product (<5%).

### Reaction of A with bromobenzene

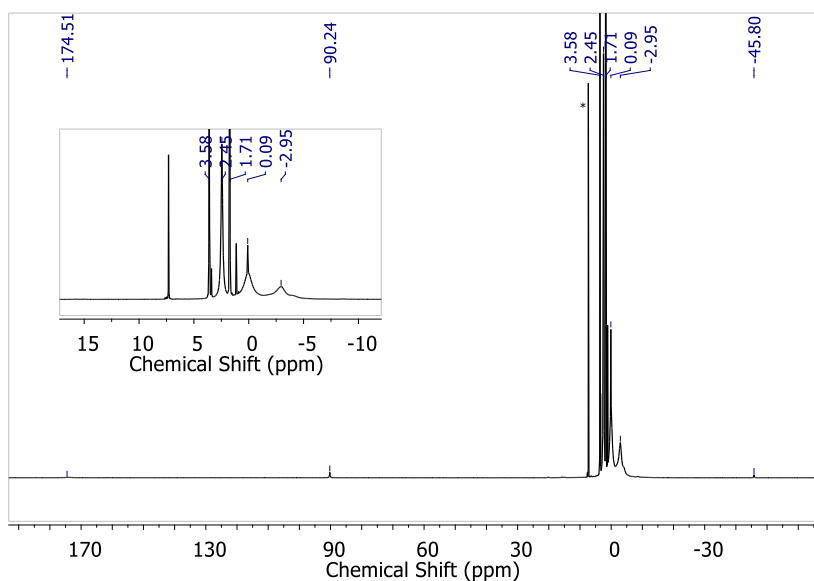

**Figure S16.**  $^1\text{H}$  NMR spectrum of a reaction of **A** with approx. 0.6 equiv. bromobenzene (500.1 MHz, THF- $d_8$ ).  $[\text{Fe}(\text{Ph})(\text{N}(\text{SiMe}_3)_2)_2]^-$ :  $\delta$  (ppm) = 174.5 ( $\text{C}^{\text{Ar}}\text{-H}$ ) 90.2 (2H,  $\text{C}^{\text{Ar}}\text{-H}$ ), -2.95 (36H,  $\text{SiMe}_3$ ), -45.8 (2H,  $\text{C}^{\text{Ar}}\text{-H}$ ).  $[\text{Fe}(\text{Br})(\text{N}(\text{SiMe}_3)_2)_2]^-$ :  $\delta$  (ppm) = -0.09 (36H,  $\text{SiMe}_3$ ). (\*) denotes unreacted bromobenzene.

### Reaction of A with chlorobenzene

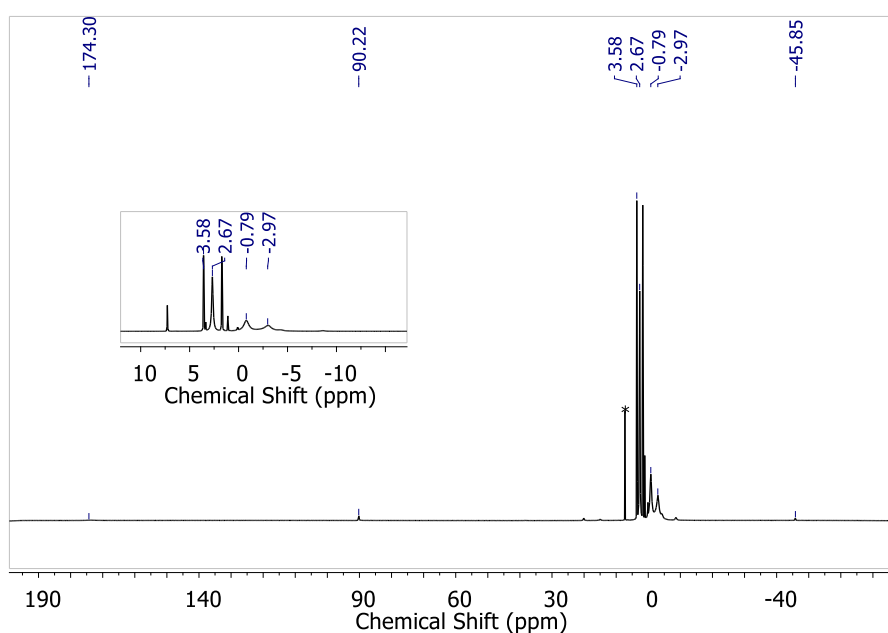

**Figure S17.**  $^1\text{H}$  NMR spectrum of a reaction of **A** with approx. 0.6 equiv. chlorobenzene (500.1 MHz, THF- $d_8$ ).  $[\text{Fe}(\text{Ph})(\text{N}(\text{SiMe}_3)_2)_2]^-$ :  $\delta$  (ppm) = 174.5 ( $\text{C}^{\text{Ar}}\text{-H}$ ) 90.2 (2H,  $\text{C}^{\text{Ar}}\text{-H}$ ), -2.95 (36H,  $\text{SiMe}_3$ ), -45.8 (2H,  $\text{C}^{\text{Ar}}\text{-H}$ ).  $[\text{Fe}(\text{Cl})(\text{N}(\text{SiMe}_3)_2)_2]^-$ :  $\delta$  (ppm) = -0.79 ( $\text{SiMe}_3$ ). (\*) denotes unreacted chlorobenzene.

## Reaction of A with fluorobenzene

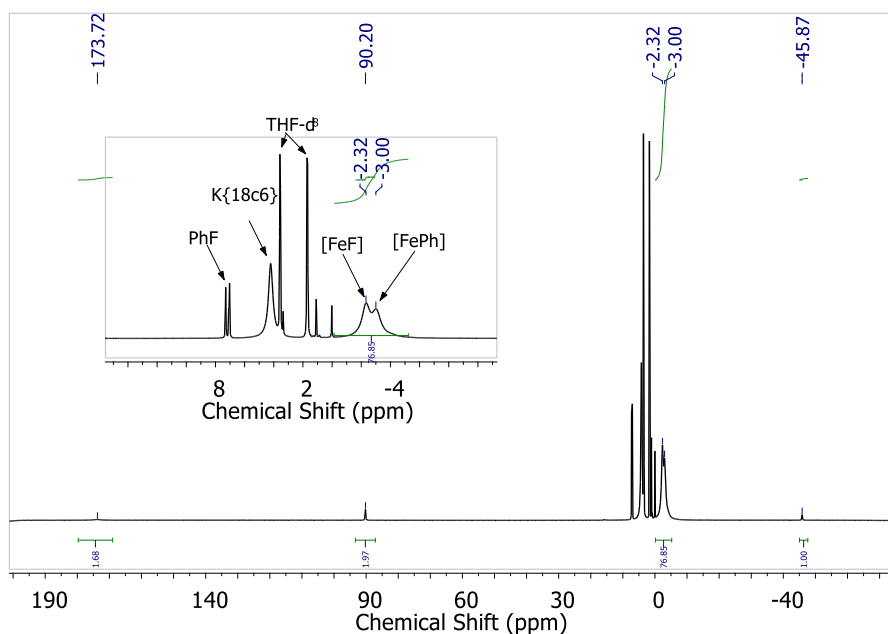

**Figure S18.**  $^1\text{H}$  NMR spectrum of a reaction of **A** with 0.5 equiv. fluorobenzene (500.1 MHz,  $\text{THF-d}_8$ ).  $[\text{Fe}(\text{Ph})(\text{N}(\text{SiMe}_3)_2)_2]^-$ :  $\delta$  (ppm) = 173.7 ( $\text{C}^{\text{Ar}}\text{-H}$ ), 91.5 ( $\text{C}^{\text{Ar}}\text{-H}$ ), -3.00 ( $\text{SiMe}_3$ ), 46.5 ( $\text{C}^{\text{Ar}}\text{-H}$ ).  $[\text{Fe}(\text{F})(\text{N}(\text{SiMe}_3)_2)_2]^-$ :  $\delta$  (ppm) = -2.29 ( $\text{SiMe}_3$ ).

## Reaction of A with Radical Clocks

### Reaction of A with cyclopropyl methyl bromide

34 mg (0.05 mmol, 1.0 equiv.) **A** were reacted with 3.4 mg (0.025 mmol, 0.5 equiv.) cyclopropyl methyl bromide in  $\text{THF-d}_8$ .

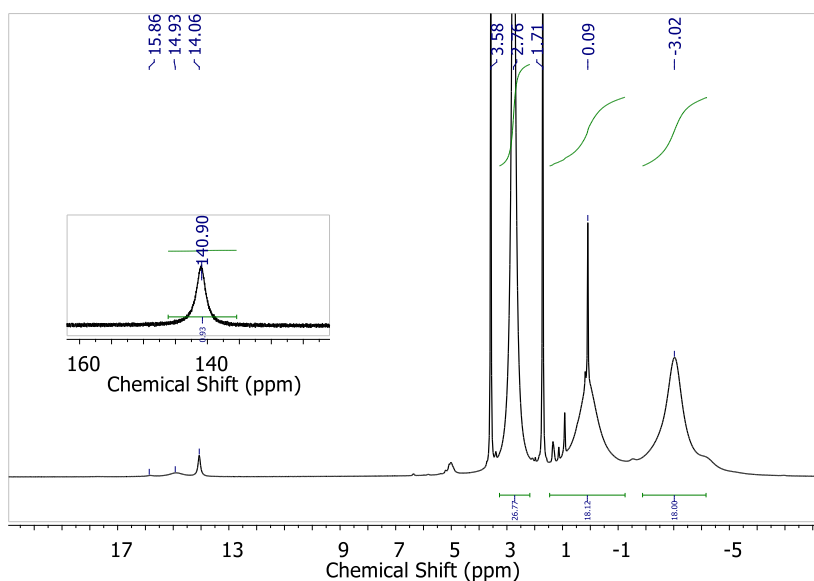

**Figure S19.**  $^1\text{H}$ -NMR spectrum of the reaction of **A** with 1 equiv. cyclopropyl methyl bromide (500.1 MHz,  $\text{THF-d}_8$ ).  $\text{Fe}(\text{Br})(\text{N}(\text{SiMe}_3)_2)_2^-$ :  $\delta$  = -0.09 ppm.  $\text{Fe}(\text{R})(\text{N}(\text{SiMe}_3)_2)_2^-$ :  $\delta$  = 140.9, 15.9, 14.9, 14.1, -3.02 ppm.

NMR-spectroscopic examination after quenching with D<sub>2</sub>O and subsequent distillation showed quantitative formation of 1-Deutero-3-butene. <sup>1</sup>H-NMR (500.1 MHz, THF-d<sub>8</sub>, 300 K, ppm): δ = 5.83 (1H, ddt, <sup>3</sup>J<sub>HH</sub> = 17.0 Hz, <sup>3</sup>J<sub>HH</sub> = 17.5 Hz, <sup>3</sup>J<sub>HH</sub> = 6.5 Hz, H<sub>2</sub>C=CH-CH<sub>2</sub>), 4.98-4.93 (1H, ddt, <sup>3</sup>J<sub>HH</sub> = 17.0 Hz, <sup>2</sup>J<sub>HH</sub> = 2.0 Hz, <sup>3</sup>J<sub>HH</sub> = 1.5 Hz, H<sub>2</sub>C=CH), 4.88-4.85 (1H, ddt, <sup>3</sup>J<sub>HH</sub> = 10.5 Hz, <sup>2</sup>J<sub>HH</sub> = 2.0 Hz, <sup>3</sup>J<sub>HH</sub> = 1.5 Hz, H<sub>2</sub>C=CH), 2.05-2.00 (2H, m, CH<sub>2</sub>-CH<sub>2</sub>D), 0.95 (2H, dt\*, <sup>3</sup>J<sub>HH</sub> = 7.5 Hz, <sup>2</sup>J<sub>HD</sub> = 2.0 Hz, CH<sub>2</sub>D). <sup>13</sup>C{<sup>1</sup>H}-NMR (125.8 MHz, THF-d<sub>8</sub>, 300 K, ppm): δ = 141.3 (H<sub>2</sub>C=CH), 113.37 (H<sub>2</sub>C=CH), 27.5 (CH<sub>2</sub>), 13.3 (t, <sup>1</sup>J<sub>CD</sub> = 18.9 Hz, CH<sub>2</sub>D).

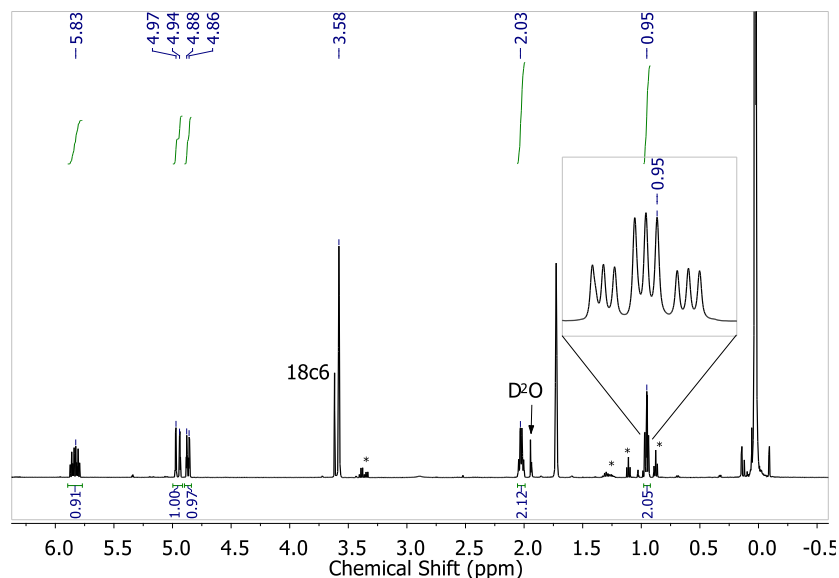

**Figure S20.** <sup>1</sup>H-NMR spectrum of the reaction of **A** with cyclopropyl methylbromide after quenching with D<sub>2</sub>O and subsequent distillation (500 MHz, THF-d<sub>8</sub>). (\*) denotes residual pentane and Et<sub>2</sub>O.

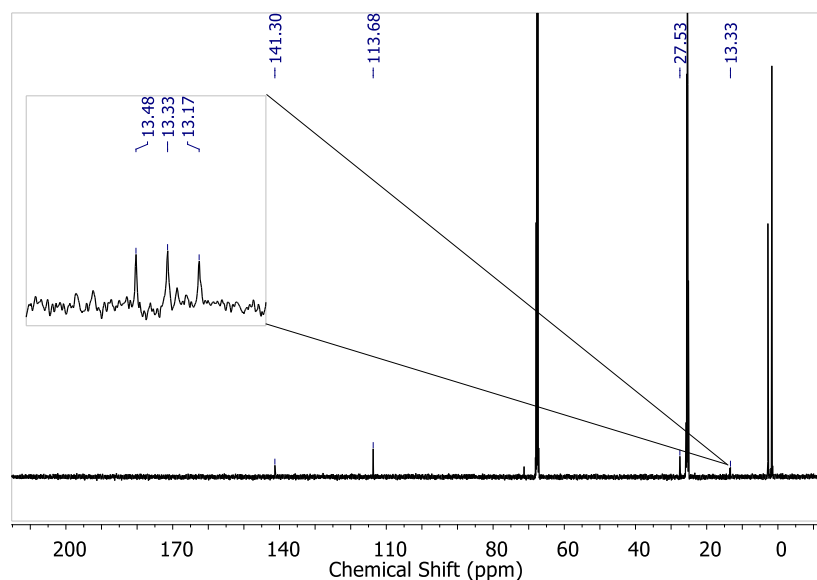

**Figure S21.** <sup>13</sup>C{<sup>1</sup>H} NMR spectrum of the reaction of **A** with cyclopropyl methylbromide after quenching with D<sub>2</sub>O and subsequent distillation (500 MHz, THF-d<sub>8</sub>). The small frame depicts the triplet signal of the terminal CH<sub>2</sub>D-group.

### Reaction of A with 6-bromo-1-hexene

34 mg (0.05 mmol, 1.0 equiv.) **A** was reacted with 3.3  $\mu$ l (0.025 mmol, 0.5 equiv.) 6-bromo-1-hexene in THF- $d_8$ .

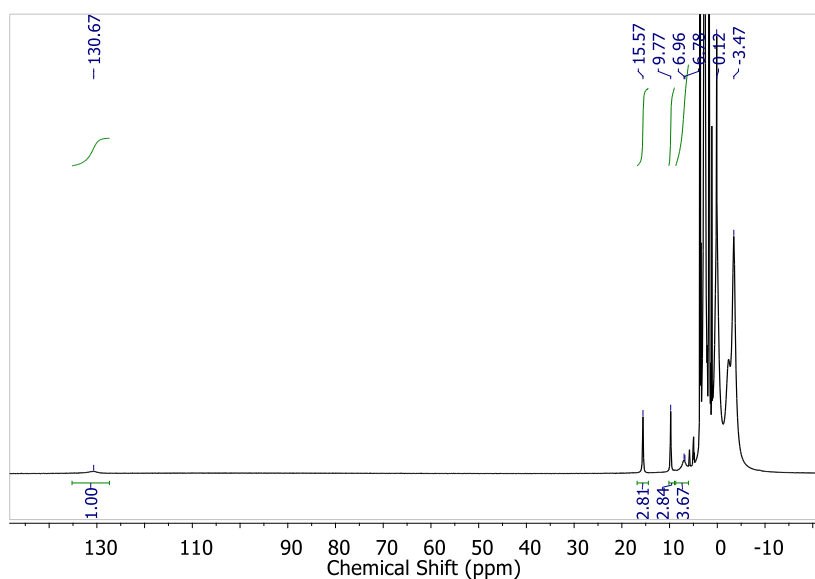

**Figure S22.**  $^1\text{H}$ -NMR spectrum of the reaction of **A** with 1 equiv. 6-Bromo-1-hexene (500 MHz, THF- $d_8$ ).  $\text{Fe}(\text{Br})(\text{N}(\text{SiMe}_3)_2)_2^-$ :  $\delta = -0.12$  ppm.  $\text{Fe}(\text{R})(\text{N}(\text{SiMe}_3)_2)_2^-$ :  $\delta$  [ppm] = 130 ( $w_{1/2} = 1050$  Hz, CH), 15.57 ( $w_{1/2} = 80$  Hz), 9.77 ( $w_{1/2} = 78$  Hz), 6.96 ( $w_{1/2} = 715$  Hz), -3.02 ( $w_{1/2} = 400$  Hz, SiMe $_3$ ).

NMR-spectroscopic examination after quenching with  $\text{D}_2\text{O}$  and subsequent distillation showed formation of cyclopentyl deuterio methane (90%) as the main product with small amounts of 6-Deutero-1-hexene (10%).

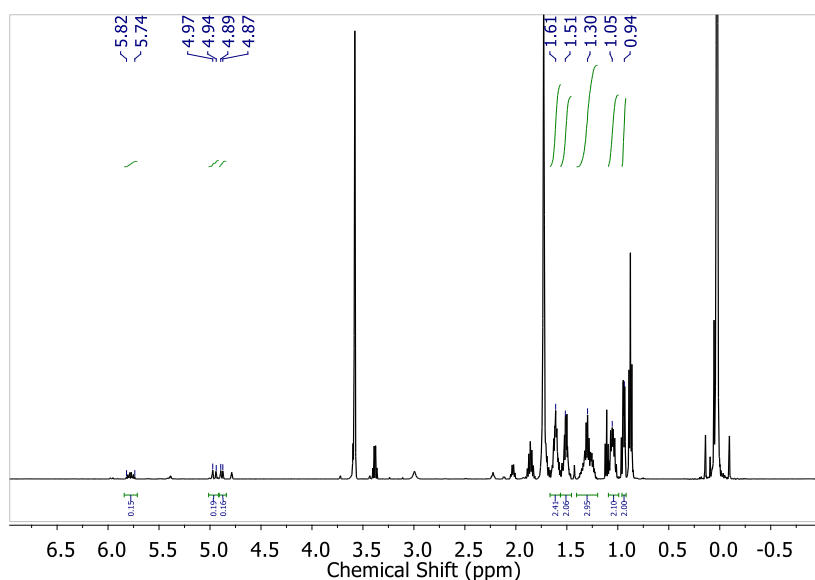

**Figure S23.**  $^1\text{H}$ -NMR spectrum of the reaction of **A** with 6-bromo-1-hexene after quenching with  $\text{D}_2\text{O}$  and subsequent distillation (500 MHz, THF- $d_8$ ).

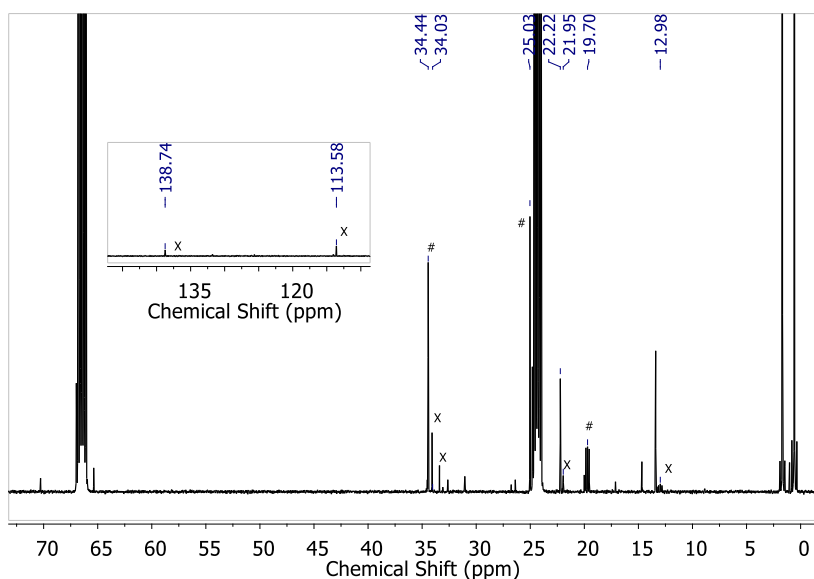

**Figure S24.**  $^{13}\text{C}\{^1\text{H}\}$  NMR spectrum of the reaction of **A** with 6-bromo-1-hexene after quenching with  $\text{D}_2\text{O}$  and subsequent distillation (500 MHz,  $\text{THF-d}_8$ ). (#) denotes cyclopentyl deuteromethane. (x) denotes 6-deutero-1-hexene.

### Reaction of **3a** with one equivalent Ph-Li

**3a** and Ph-Li were each dissolved in 0.5 ml  $\text{THF-d}_8$  and precooled to  $-80^\circ\text{C}$ . Both solutions were combined leading to a bright red solution and immediately measured afterwards

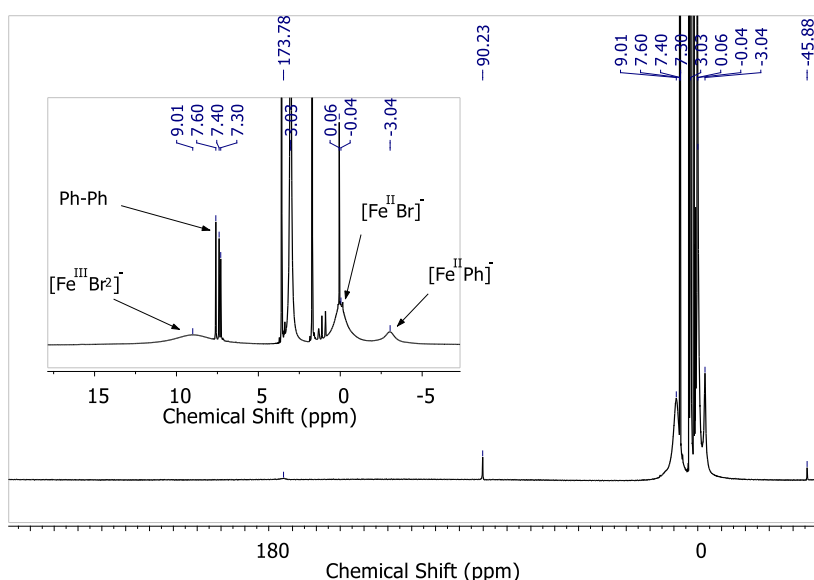

**Figure S25.**  $^1\text{H}$  NMR spectrum of a reaction of **3a** with 1 equiv. Ph-Li after 5 minutes (500.1 MHz,  $\text{THF-d}_8$ ).  $\text{Fe}(\text{Ph})(\text{N}(\text{SiMe}_3)_2)_2^-$ :  $\delta$  (ppm) = 173.8 ( $\text{C}_{\text{Ar-H}}$ ), 90.23 ( $\text{C}_{\text{Ar-H}}$ ), -3.0 ( $\text{SiMe}_3$ ), -45.9 ( $\text{C}_{\text{Ar-H}}$ ).  $\text{Fe}(\text{Br})(\text{N}(\text{SiMe}_3)_2)_2^-$ :  $\delta$  (ppm) = 0.04 ( $\text{SiMe}_3$ ).  $\text{Fe}(\text{Br})_2(\text{N}(\text{SiMe}_3)_2)_2^-$ :  $\delta$  (ppm) = 9 ( $\text{SiMe}_3$ ).

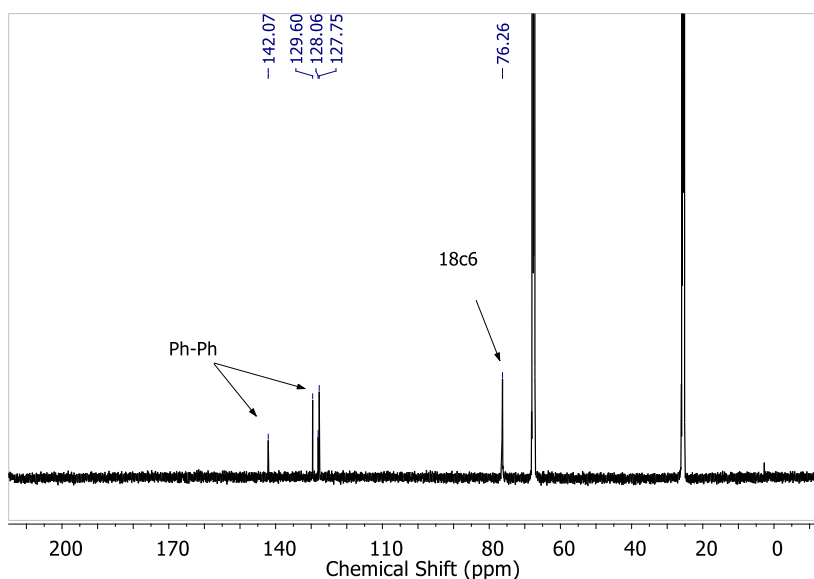

**Figure S26.**  $^{13}\text{C}\{^1\text{H}\}$  NMR spectrum of a reaction of **3a** with 1 equiv. Ph-Li after 5 minutes (500.1 MHz, THF- $d_8$ ). Ph-Ph:  $\delta$  (ppm) = 142.1 ( $\text{C}_q$ ), 129.6 ( $\text{C}_{\text{ortho/meta-H}}$ ), 128.1 ( $\text{C}_{\text{para-H}}$ ), 127.8 ( $\text{C}_{\text{ortho/meta-H}}$ ).

### X-Ray diffraction analysis and molecular structures

Data for **1a** (CCDC 1858772), **1b** (CCDC 1858774), **1c** (CCDC 1858775), **2** (CCDC 1858795), **3a** (CCDC 1858797), **3b** (CCDC 1858796), **5** (CCDC 1858800), **6** (CCDC 1858798) were collected at 100 K on a Bruker Quest D8 diffractometer using a graphite-monochromated Mo- $\text{K}\alpha$  radiation and equipped with an *Oxford Instrument Cooler Device*. Data for **4** (CCDC 1858801) was collected at 100 K a STOE IPDS2T diffractometer using a graphite-monochromated Mo- $\text{K}\alpha$  radiation ( $\lambda = 0.71073\text{\AA}$ ) and equipped with an *Oxford Cryosystems Cryostream Cooler Device*. The structures have been solved using either OLEX SHELXT V2014/1<sup>[i]</sup> and refined by means of least-squares procedures on a  $F^2$  with the aid of the program SHELXL-2016/6<sup>[ii]</sup> include in the softwares package WinGX version 1.63<sup>[iii]</sup> or using CRYSTALS.<sup>[iii]</sup>

The Atomic Scattering Factors were taken from *International Tables for X-Ray Crystallography*.<sup>[iv]</sup> All non-hydrogen atoms were refined anisotropically. All hydrogens atoms were refined by using a riding model. Absorption corrections were introduced by using the MULTISCAN and X-Red program.<sup>[v, ix]</sup> Drawings of molecules are performed with the programs DIAMOND and POV-Ray with 50% probability displacement ellipsoids for non-H atoms. Depiction of H atoms is omitted for clarity.



**Table S1.** Crystal data and structure refinement for **1a**.

|                                             |                                                                                    |
|---------------------------------------------|------------------------------------------------------------------------------------|
| Identification code                         | k(18c6)_febr(1a)                                                                   |
| Empirical formula                           | C <sub>24</sub> H <sub>60</sub> BrFeKN <sub>2</sub> O <sub>6</sub> Si <sub>4</sub> |
| Formula weight                              | 759.96                                                                             |
| Temperature/K                               | 100.01                                                                             |
| Crystal system                              | triclinic                                                                          |
| Space group                                 | P-1                                                                                |
| a/Å                                         | 11.8367(6)                                                                         |
| b/Å                                         | 12.8422(7)                                                                         |
| c/Å                                         | 15.1912(9)                                                                         |
| α/°                                         | 81.153(2)                                                                          |
| β/°                                         | 72.566(2)                                                                          |
| γ/°                                         | 65.531(2)                                                                          |
| Volume/Å <sup>3</sup>                       | 2004.08(19)                                                                        |
| Z                                           | 2                                                                                  |
| ρ <sub>calc</sub> /g/cm <sup>3</sup>        | 1.259                                                                              |
| μ/mm <sup>-1</sup>                          | 1.629                                                                              |
| F(000)                                      | 804.0                                                                              |
| Crystal size/mm <sup>3</sup>                | 0.589 × 0.236 × 0.172                                                              |
| Radiation                                   | MoKα (λ = 0.71073)                                                                 |
| 2θ range for data collection/°              | 4.278 to 52.34                                                                     |
| Index ranges                                | -14 ≤ h ≤ 14, -15 ≤ k ≤ 15, -17 ≤ l ≤ 18                                           |
| Reflections collected                       | 45143                                                                              |
| Independent reflections                     | 7988 [R <sub>int</sub> = 0.0605, R <sub>sigma</sub> = 0.0412]                      |
| Data/restraints/parameters                  | 7988/0/373                                                                         |
| Goodness-of-fit on F <sup>2</sup>           | 1.031                                                                              |
| Final R indexes [I ≥ 2σ (I)]                | R <sub>1</sub> = 0.0309, wR <sub>2</sub> = 0.0630                                  |
| Final R indexes [all data]                  | R <sub>1</sub> = 0.0457, wR <sub>2</sub> = 0.0673                                  |
| Largest diff. peak/hole / e Å <sup>-3</sup> | 0.36/-0.56                                                                         |

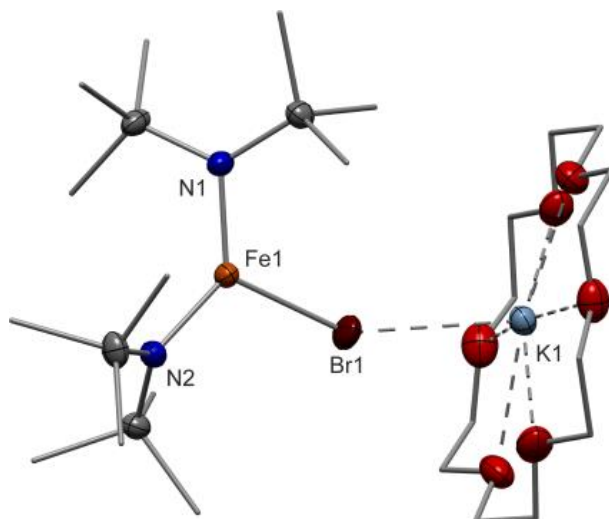**Figure S27.** Molecular structure of **1a** within the crystal.

**Table S2.** Crystal data and structure refinement for **1b**.

|                                             |                                                                                    |
|---------------------------------------------|------------------------------------------------------------------------------------|
| Identification code                         | k(18c6)_fecl(1b)                                                                   |
| Empirical formula                           | C <sub>24</sub> H <sub>60</sub> ClFeKN <sub>2</sub> O <sub>6</sub> Si <sub>4</sub> |
| Formula weight                              | 715.50                                                                             |
| Temperature/K                               | 100.0                                                                              |
| Crystal system                              | monoclinic                                                                         |
| Space group                                 | P2 <sub>1</sub> /c                                                                 |
| a/Å                                         | 8.6580(4)                                                                          |
| b/Å                                         | 19.6164(9)                                                                         |
| c/Å                                         | 23.2135(10)                                                                        |
| α/°                                         | 90                                                                                 |
| β/°                                         | 91.518(2)                                                                          |
| γ/°                                         | 90                                                                                 |
| Volume/Å <sup>3</sup>                       | 3941.2(3)                                                                          |
| Z                                           | 4                                                                                  |
| ρ <sub>calc</sub> /cm <sup>3</sup>          | 1.206                                                                              |
| μ/mm <sup>-1</sup>                          | 0.711                                                                              |
| F(000)                                      | 1536.0                                                                             |
| Crystal size/mm <sup>3</sup>                | 0.574 × 0.166 × 0.131                                                              |
| Radiation                                   | MoKα (λ = 0.71073)                                                                 |
| 2θ range for data collection/°              | 4.508 to 52.152                                                                    |
| Index ranges                                | -10 ≤ h ≤ 10, -24 ≤ k ≤ 24, -28 ≤ l ≤ 28                                           |
| Reflections collected                       | 118672                                                                             |
| Independent reflections                     | 7820 [R <sub>int</sub> = 0.0910, R <sub>sigma</sub> = 0.0330]                      |
| Data/restraints/parameters                  | 7820/0/364                                                                         |
| Goodness-of-fit on F <sup>2</sup>           | 1.078                                                                              |
| Final R indexes [I ≥ 2σ (I)]                | R <sub>1</sub> = 0.0351, wR <sub>2</sub> = 0.0725                                  |
| Final R indexes [all data]                  | R <sub>1</sub> = 0.0458, wR <sub>2</sub> = 0.0759                                  |
| Largest diff. peak/hole / e Å <sup>-3</sup> | 0.45/-0.37                                                                         |

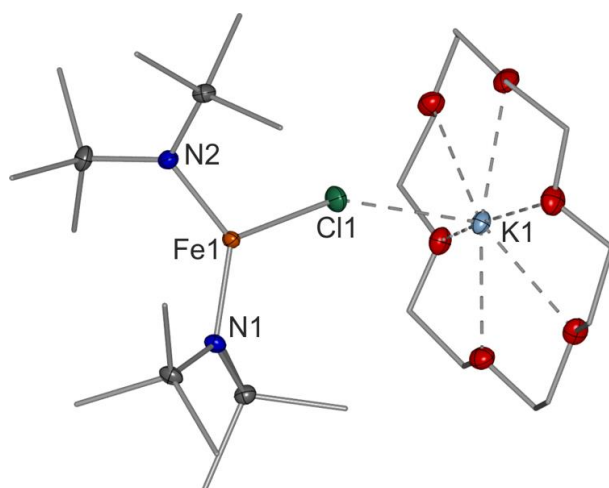**Figure S28.** Molecular structure of **1b** within the crystal.

**Table S3.** Crystal data and structure refinement for **1c**.

|                                             |                                                                                                                                |
|---------------------------------------------|--------------------------------------------------------------------------------------------------------------------------------|
| Identification code                         | k(18c6)_fef(1c)                                                                                                                |
| Empirical formula                           | C <sub>72</sub> H <sub>180</sub> F <sub>3</sub> Fe <sub>3</sub> K <sub>3</sub> N <sub>6</sub> O <sub>18</sub> Si <sub>12</sub> |
| Formula weight                              | 2097.14                                                                                                                        |
| Temperature/K                               | 100.0                                                                                                                          |
| Crystal system                              | monoclinic                                                                                                                     |
| Space group                                 | P2 <sub>1</sub> /c                                                                                                             |
| a/Å                                         | 19.1913(5)                                                                                                                     |
| b/Å                                         | 12.5055(3)                                                                                                                     |
| c/Å                                         | 47.8877(13)                                                                                                                    |
| α/°                                         | 90                                                                                                                             |
| β/°                                         | 92.6170(10)                                                                                                                    |
| γ/°                                         | 90                                                                                                                             |
| Volume/Å <sup>3</sup>                       | 11480.9(5)                                                                                                                     |
| Z                                           | 4                                                                                                                              |
| ρ <sub>calc</sub> /cm <sup>3</sup>          | 1.213                                                                                                                          |
| μ/mm <sup>-1</sup>                          | 0.667                                                                                                                          |
| F(000)                                      | 4512.0                                                                                                                         |
| Crystal size/mm <sup>3</sup>                | 0.341 × 0.276 × 0.115                                                                                                          |
| Radiation                                   | MoKα (λ = 0.71073)                                                                                                             |
| 2θ range for data collection/°              | 4.506 to 50                                                                                                                    |
| Index ranges                                | -22 ≤ h ≤ 22, -14 ≤ k ≤ 14, -56 ≤ l ≤ 56                                                                                       |
| Reflections collected                       | 237019                                                                                                                         |
| Independent reflections                     | 20179 [R <sub>int</sub> = 0.0753, R <sub>sigma</sub> = 0.0244]                                                                 |
| Data/restraints/parameters                  | 20179/0/1101                                                                                                                   |
| Goodness-of-fit on F <sup>2</sup>           | 1.095                                                                                                                          |
| Final R indexes [I >= 2σ (I)]               | R <sub>1</sub> = 0.0317, wR <sub>2</sub> = 0.0772                                                                              |
| Final R indexes [all data]                  | R <sub>1</sub> = 0.0364, wR <sub>2</sub> = 0.0790                                                                              |
| Largest diff. peak/hole / e Å <sup>-3</sup> | 0.49/-0.30                                                                                                                     |

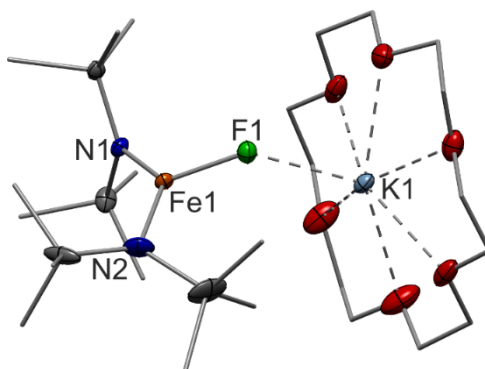**Figure S29.** Molecular structure of **1c** within the crystal.

**Table S4.** Crystal data and structure refinement for **2**.

|                                             |                                                                                  |
|---------------------------------------------|----------------------------------------------------------------------------------|
| Identification code                         | k(18c6)_febz(2)                                                                  |
| Empirical formula                           | C <sub>31</sub> H <sub>67</sub> FeKN <sub>2</sub> O <sub>6</sub> Si <sub>4</sub> |
| Formula weight                              | 771.17                                                                           |
| Temperature/K                               | 100.01                                                                           |
| Crystal system                              | triclinic                                                                        |
| Space group                                 | P-1                                                                              |
| a/Å                                         | 9.0328(9)                                                                        |
| b/Å                                         | 19.980(2)                                                                        |
| c/Å                                         | 24.078(3)                                                                        |
| α/°                                         | 91.857(4)                                                                        |
| β/°                                         | 94.986(4)                                                                        |
| γ/°                                         | 92.202(4)                                                                        |
| Volume/Å <sup>3</sup>                       | 4323.0(8)                                                                        |
| Z                                           | 4                                                                                |
| ρ <sub>calc</sub> /cm <sup>3</sup>          | 1.185                                                                            |
| μ/mm <sup>-1</sup>                          | 0.593                                                                            |
| F(000)                                      | 1664.0                                                                           |
| Crystal size/mm <sup>3</sup>                | 0.498 × 0.196 × 0.056                                                            |
| Radiation                                   | MoKα (λ = 0.71073)                                                               |
| 2θ range for data collection/°              | 4.366 to 49.998                                                                  |
| Index ranges                                | -10 ≤ h ≤ 10, -23 ≤ k ≤ 23, -28 ≤ l ≤ 28                                         |
| Reflections collected                       | 94329                                                                            |
| Independent reflections                     | 15131 [R <sub>int</sub> = 0.0607, R <sub>sigma</sub> = 0.0484]                   |
| Data/restraints/parameters                  | 15131/177/841                                                                    |
| Goodness-of-fit on F <sup>2</sup>           | 1.168                                                                            |
| Final R indexes [I ≥ 2σ (I)]                | R <sub>1</sub> = 0.1083, wR <sub>2</sub> = 0.2652                                |
| Final R indexes [all data]                  | R <sub>1</sub> = 0.1230, wR <sub>2</sub> = 0.2697                                |
| Largest diff. peak/hole / e Å <sup>-3</sup> | 2.06/-0.77                                                                       |

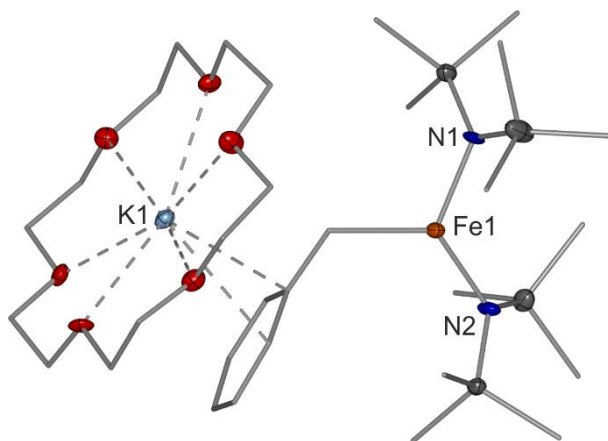**Figure S30.** Molecular structure of **2** within the crystal. A disorder on one of the SiMe<sub>3</sub> group is and the second molecule of **2** in the unit cell is not depicted.

**Table S5.** Crystal data and structure refinement for **3a**.

|                                             |                                                                                                  |
|---------------------------------------------|--------------------------------------------------------------------------------------------------|
| Identification code                         | k(18c6)_febr2_(3a)                                                                               |
| Empirical formula                           | C <sub>24</sub> H <sub>60</sub> Br <sub>2</sub> FeKN <sub>2</sub> O <sub>6</sub> Si <sub>4</sub> |
| Formula weight                              | 839.87                                                                                           |
| Temperature/K                               | 100.02                                                                                           |
| Crystal system                              | triclinic                                                                                        |
| Space group                                 | P-1                                                                                              |
| a/Å                                         | 12.1198(5)                                                                                       |
| b/Å                                         | 18.0228(7)                                                                                       |
| c/Å                                         | 20.7923(9)                                                                                       |
| α/°                                         | 111.8930(10)                                                                                     |
| β/°                                         | 98.352(2)                                                                                        |
| γ/°                                         | 99.4360(10)                                                                                      |
| Volume/Å <sup>3</sup>                       | 4050.1(3)                                                                                        |
| Z                                           | 4                                                                                                |
| ρ <sub>calc</sub> /cm <sup>3</sup>          | 1.377                                                                                            |
| μ/mm <sup>-1</sup>                          | 2.600                                                                                            |
| F(000)                                      | 1748.0                                                                                           |
| Crystal size/mm <sup>3</sup>                | 0.255 × 0.201 × 0.148                                                                            |
| Radiation                                   | MoKα (λ = 0.71073)                                                                               |
| 2θ range for data collection/°              | 4.42 to 49.994                                                                                   |
| Index ranges                                | -14 ≤ h ≤ 14, -21 ≤ k ≤ 21, -24 ≤ l ≤ 24                                                         |
| Reflections collected                       | 131290                                                                                           |
| Independent reflections                     | 14259 [R <sub>int</sub> = 0.0480, R <sub>sigma</sub> = 0.0223]                                   |
| Data/restraints/parameters                  | 14259/281/957                                                                                    |
| Goodness-of-fit on F <sup>2</sup>           | 1.025                                                                                            |
| Final R indexes [I ≥ 2σ (I)]                | R <sub>1</sub> = 0.0300, wR <sub>2</sub> = 0.0664                                                |
| Final R indexes [all data]                  | R <sub>1</sub> = 0.0406, wR <sub>2</sub> = 0.0695                                                |
| Largest diff. peak/hole / e Å <sup>-3</sup> | 0.64/-0.77                                                                                       |

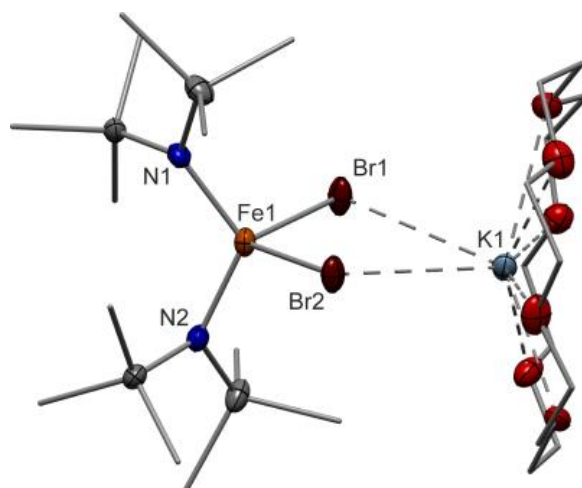

**Figure S31.** Molecular structure of **3a** within the crystal.

**Table S6.** Crystal data and structure refinement for **3b**.

|                                             |                                                                                                  |
|---------------------------------------------|--------------------------------------------------------------------------------------------------|
| Identification code                         | K(18c6)_FeCl2_(3b)                                                                               |
| Empirical formula                           | C <sub>24</sub> H <sub>60</sub> Cl <sub>2</sub> FeKN <sub>2</sub> O <sub>6</sub> Si <sub>4</sub> |
| Formula weight                              | 750.95                                                                                           |
| Temperature/K                               | 100.0                                                                                            |
| Crystal system                              | triclinic                                                                                        |
| Space group                                 | P-1                                                                                              |
| a/Å                                         | 11.9279(8)                                                                                       |
| b/Å                                         | 17.7448(12)                                                                                      |
| c/Å                                         | 20.9599(15)                                                                                      |
| α/°                                         | 111.463(2)                                                                                       |
| β/°                                         | 97.733(2)                                                                                        |
| γ/°                                         | 99.677(2)                                                                                        |
| Volume/Å <sup>3</sup>                       | 3975.9(5)                                                                                        |
| Z                                           | 4                                                                                                |
| ρ <sub>calc</sub> /g/cm <sup>3</sup>        | 1.255                                                                                            |
| μ/mm <sup>-1</sup>                          | 0.773                                                                                            |
| F(000)                                      | 1604.0                                                                                           |
| Crystal size/mm <sup>3</sup>                | 0.3 × 0.2 × 0.1                                                                                  |
| Radiation                                   | MoKα (λ = 0.71073)                                                                               |
| 2θ range for data collection/°              | 4.274 to 49.998                                                                                  |
| Index ranges                                | -14 ≤ h ≤ 13, -21 ≤ k ≤ 19, 0 ≤ l ≤ 24                                                           |
| Reflections collected                       | 13943                                                                                            |
| Independent reflections                     | 13943 [R <sub>int</sub> = ?, R <sub>sigma</sub> = 0.0646]                                        |
| Data/restraints/parameters                  | 13943/1950/1060                                                                                  |
| Goodness-of-fit on F <sup>2</sup>           | 1.020                                                                                            |
| Final R indexes [I >= 2σ (I)]               | R <sub>1</sub> = 0.0485, wR <sub>2</sub> = 0.1069                                                |
| Final R indexes [all data]                  | R <sub>1</sub> = 0.0657, wR <sub>2</sub> = 0.1141                                                |
| Largest diff. peak/hole / e Å <sup>-3</sup> | 0.59/-0.72                                                                                       |

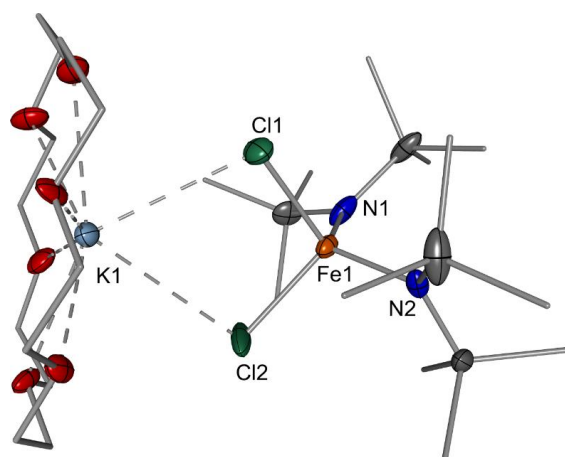

**Figure 32.** Molecular structure of **3b** within the crystal. Disorders at K{18c6} unit and at one of the hmds ligand are not depicted.

**Table S6.** Crystal data and structure refinement for **4**.

|                                             |                                                                   |
|---------------------------------------------|-------------------------------------------------------------------|
| Identification code                         | kfebz_(4)                                                         |
| Empirical formula                           | C <sub>19</sub> H <sub>43</sub> FeKN <sub>2</sub> Si <sub>4</sub> |
| Formula weight                              | 506.86                                                            |
| Temperature/K                               | 100.0                                                             |
| Crystal system                              | monoclinic                                                        |
| Space group                                 | P2 <sub>1</sub> /n                                                |
| a/Å                                         | 9.1546(5)                                                         |
| b/Å                                         | 20.9176(17)                                                       |
| c/Å                                         | 15.0072(9)                                                        |
| α/°                                         | 90                                                                |
| β/°                                         | 91.405(5)                                                         |
| γ/°                                         | 90                                                                |
| Volume/Å <sup>3</sup>                       | 2872.9(3)                                                         |
| Z                                           | 4                                                                 |
| ρ <sub>calc</sub> /cm <sup>3</sup>          | 1.172                                                             |
| μ/mm <sup>-1</sup>                          | 0.844                                                             |
| F(000)                                      | 1088.0                                                            |
| Crystal size/mm <sup>3</sup>                | 0.74 × 0.413 × 0.347                                              |
| Radiation                                   | MoKα (λ = 0.71073)                                                |
| 2θ range for data collection/°              | 5.156 to 52.998                                                   |
| Index ranges                                | -11 ≤ h ≤ 9, -26 ≤ k ≤ 25, -18 ≤ l ≤ 18                           |
| Reflections collected                       | 18141                                                             |
| Independent reflections                     | 5941 [R <sub>int</sub> = 0.0990, R <sub>sigma</sub> = 0.0706]     |
| Data/restraints/parameters                  | 5941/0/256                                                        |
| Goodness-of-fit on F <sup>2</sup>           | 1.062                                                             |
| Final R indexes [I ≥ 2σ(I)]                 | R <sub>1</sub> = 0.0273, wR <sub>2</sub> = 0.0661                 |
| Final R indexes [all data]                  | R <sub>1</sub> = 0.0349, wR <sub>2</sub> = 0.0687                 |
| Largest diff. peak/hole / e Å <sup>-3</sup> | 0.42/-0.34                                                        |

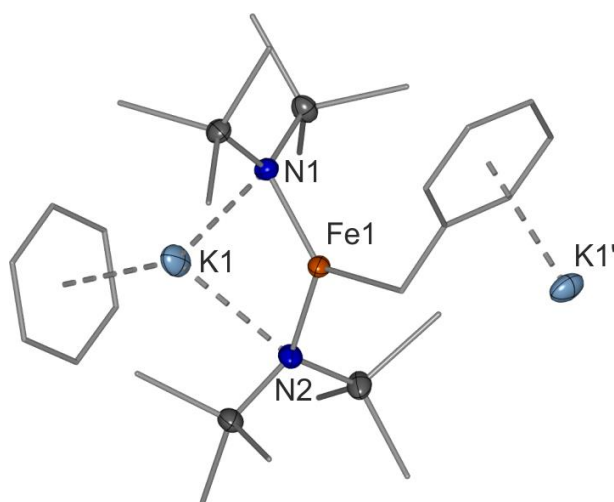

**Figure S33.** Molecular structure of **4** within the crystal. Each molecule of **4** is connected by the potassium ion to the benzyl unit of the next molecule giving overall a chain-like structure in solid state.

**Table S7.** Crystal data and structure refinement for **5a**.

|                                             |                                                                                  |
|---------------------------------------------|----------------------------------------------------------------------------------|
| Identification code                         | k(18c6)_fenbu(5a)                                                                |
| Empirical formula                           | C <sub>28</sub> H <sub>69</sub> FeKN <sub>2</sub> O <sub>6</sub> Si <sub>4</sub> |
| Formula weight                              | 737.16                                                                           |
| Temperature/K                               | 100.0                                                                            |
| Crystal system                              | triclinic                                                                        |
| Space group                                 | P-1                                                                              |
| a/Å                                         | 9.1092(4)                                                                        |
| b/Å                                         | 19.7540(9)                                                                       |
| c/Å                                         | 23.9066(9)                                                                       |
| α/°                                         | 94.5940(10)                                                                      |
| β/°                                         | 96.9240(10)                                                                      |
| γ/°                                         | 96.112(2)                                                                        |
| Volume/Å <sup>3</sup>                       | 4227.3(3)                                                                        |
| Z                                           | 4                                                                                |
| ρ <sub>calc</sub> /g/cm <sup>3</sup>        | 1.158                                                                            |
| μ/mm <sup>-1</sup>                          | 0.604                                                                            |
| F(000)                                      | 1600.0                                                                           |
| Crystal size/mm <sup>3</sup>                | 0.425 × 0.166 × 0.124                                                            |
| Radiation                                   | MoKα (λ = 0.71073)                                                               |
| 2θ range for data collection/°              | 4.356 to 53.612                                                                  |
| Index ranges                                | -11 ≤ h ≤ 11, -25 ≤ k ≤ 25, -30 ≤ l ≤ 30                                         |
| Reflections collected                       | 126701                                                                           |
| Independent reflections                     | 18048 [R <sub>int</sub> = 0.0600, R <sub>sigma</sub> = 0.0378]                   |
| Data/restraints/parameters                  | 18048/57/811                                                                     |
| Goodness-of-fit on F <sup>2</sup>           | 1.032                                                                            |
| Final R indexes [I ≥ 2σ (I)]                | R <sub>1</sub> = 0.0356, wR <sub>2</sub> = 0.0695                                |
| Final R indexes [all data]                  | R <sub>1</sub> = 0.0557, wR <sub>2</sub> = 0.0756                                |
| Largest diff. peak/hole / e Å <sup>-3</sup> | 0.70/-0.85                                                                       |

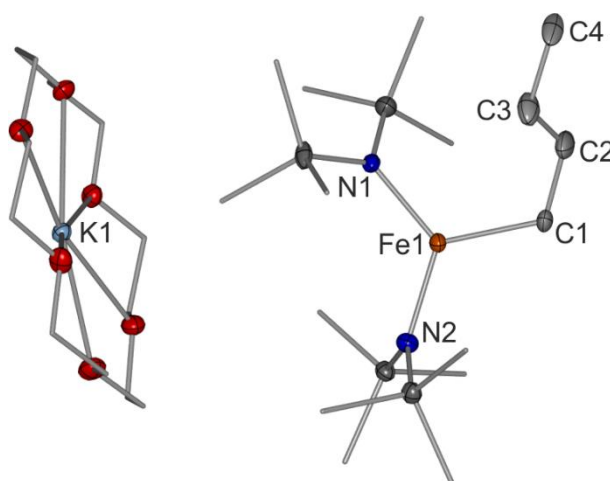**Figure S34.** Molecular structure of **5a** within the crystal. Disorder at C4 is omitted for clarity.



**Table S8.** Crystal data and structure refinement for **6**.

|                                             |                                                                                  |
|---------------------------------------------|----------------------------------------------------------------------------------|
| Identification code                         | k(18c6)_feph_(6)                                                                 |
| Empirical formula                           | C <sub>30</sub> H <sub>65</sub> FeKN <sub>2</sub> O <sub>6</sub> Si <sub>4</sub> |
| Formula weight                              | 757.15                                                                           |
| Temperature/K                               | 100.0                                                                            |
| Crystal system                              | monoclinic                                                                       |
| Space group                                 | P2 <sub>1</sub> /n                                                               |
| a/Å                                         | 10.1672(4)                                                                       |
| b/Å                                         | 23.7130(9)                                                                       |
| c/Å                                         | 17.7834(9)                                                                       |
| $\alpha$ /°                                 | 90                                                                               |
| $\beta$ /°                                  | 92.968(2)                                                                        |
| $\gamma$ /°                                 | 90                                                                               |
| Volume/Å <sup>3</sup>                       | 4281.7(3)                                                                        |
| Z                                           | 4                                                                                |
| $\rho_{\text{calc}}$ /g/cm <sup>3</sup>     | 1.175                                                                            |
| $\mu$ /mm <sup>-1</sup>                     | 0.598                                                                            |
| F(000)                                      | 1632.0                                                                           |
| Crystal size/mm <sup>3</sup>                | 0.325 × 0.21 × 0.16                                                              |
| Radiation                                   | MoK $\alpha$ ( $\lambda$ = 0.71073)                                              |
| 2 $\theta$ range for data collection/°      | 4.516 to 53.998                                                                  |
| Index ranges                                | -12 ≤ h ≤ 12, -30 ≤ k ≤ 30, -22 ≤ l ≤ 20                                         |
| Reflections collected                       | 53588                                                                            |
| Independent reflections                     | 9340 [R <sub>int</sub> = 0.0567, R <sub>sigma</sub> = 0.0398]                    |
| Data/restraints/parameters                  | 9340/0/439                                                                       |
| Goodness-of-fit on F <sup>2</sup>           | 1.031                                                                            |
| Final R indexes [I ≥ 2 $\sigma$ (I)]        | R <sub>1</sub> = 0.0446, wR <sub>2</sub> = 0.0977                                |
| Final R indexes [all data]                  | R <sub>1</sub> = 0.0685, wR <sub>2</sub> = 0.1049                                |
| Largest diff. peak/hole / e Å <sup>-3</sup> | 0.89/-0.49                                                                       |

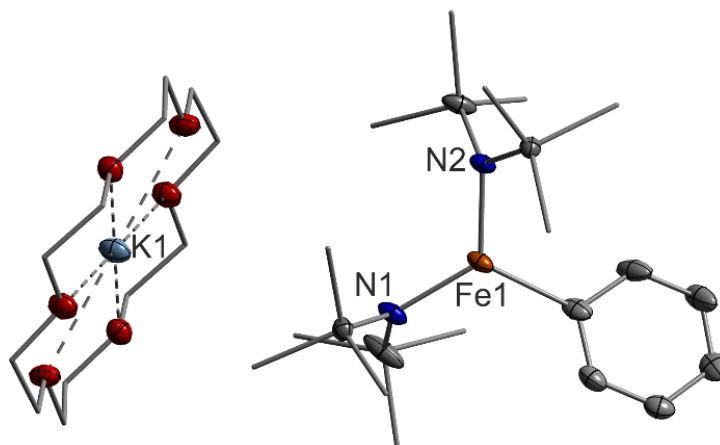

**Figure S35.** Molecular structure of **6** within the crystal. Disorder at the 18c6 unit is omitted for clarity.

## References

---

- [i] G. M. Sheldrick, *Acta Cryst.* **2015**, *71*, 3.
- [ii] L. Farrugia, *J. Appl. Crystallogr.*, 1999, *32*, 837-838.
- [iii] P. W. Betteridge, J. R. Carruthers, R. I. Cooper, K. Prout, D. J. Watkin *J. Appl. Cryst.* **2003**, *36*, 1487.
- [iv] *International Tables for X-ray crystallography* (Kynoch Press, Birmingham, England, 1974) *Vol. IV*.
- [v] *SADABS-2016/2* (Bruker, **2016**).
- [ix] X-Area, X-Red 1.63.1.0 (STOE, **2016**).
